# Supplementary material for: RARγ-induced E-cadherin downregulation promotes hepatocellular carcinoma invasion and metastasis
Source: PubMed Central journal article supplement (PMC5069892; doi:10.1186/s13046-016-0441-9), 2016-10-19

## Supplementary Figure 2

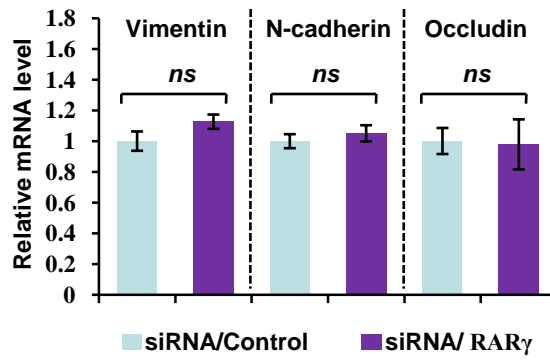

Supplement: 13046_2016_441_MOESM2_ESM.pdf [file 13046_2016_441_MOESM2_ESM.pdf]
